# Supplementary material
Source: PubMed Central journal article supplement (PMC8062793)
Supplement: mmc1.pdf [file mmc1.pdf]

37 [red bar] 107  
B145 VTPYYGPGHI T-SDWCGFGD SRSDCTNPYS PMS-----LD IPQQLC--SK FSSKSSSSMF LSLHWNNTSS FVSYDYFNCG  
BRV VTPYYGPGHI T-FDWCWFGD SRSDCTNPQS PMS-----LD IPQQLC--PK FSSKSSSSMF LSLHWNHSS FVSYDYFNCG  
B150 VTPYYGPGHI T-SDWCGFGD SRSDCNPYF PSS-----LD IPQQLC--SK FSSKSSSSMF ISLHWNNSVD FVAYNYSNCG  
P-MAR ITPHYGPGHI T-PDWCGFGD SRSDCGNKHT PKS-----LD IPQELC--PK FSSRTGSSMF ISMHWNNGSG FADFADYSNCG  
P10 ITPHYGPGHI T-SDWCGFGD SRSDCGNQHT PKS-----LD IPQELC--PK FSSRTGSSMF ISMHWNNDSD FNAFGYSNCG  
P4 ITPHYGPGHI T-SDWCGFGD SRSDCTNPSS PKS-----LD IPQQLC--PK FSSKTGSSMF ISLHWNNSVD FVAYNYSNCG  
C/MI/4/93 VKPKAGASVL NQSTWIGFGD SRTDKSNPNF PRS-----AD VSVKTA--NK FRSSTGGSLM LSMF--GPPG KVDVLYQGCG  
C/JHG/66 VKPKAGASVL NQSTWIGFGD SRTDKSNSAF PRS-----AD VSAKTA--DK FRFLSGGSLM LSMF--GPPG KVDVLYQGCG  
BCoV NPPTNVVSHL N-GDWFLFGD SRSDCNHVVN TNPRNYSYMD LNPALCDSGK ISSKAGNSIF RSFHF---TD F--YNYTGEG  
OC43 NPPTNVVSHV N-GDWFLFGD SRSDCNHIVN INPHNYSYMD LNPVLCDSGK ISSKAGNSIF RSFHF---TD F--YNYTGEG  
PHEV NPPTNVVSHF N-DDWFLFGD SRTDCNHVVK TNPRNYSYMD LNPALCDSGK ISSKAGNSIF RSFHF---TD F--YNYTGEG  
ECOV NPPVNIIVSHI N-EDWFLFGD SRSDCNHINT INPRNYSYMD LNPALCDSGK ISSKAGNSIF RSFHF---TD F--YNYTGEG  
DVIM NEPLNVVSHL N-DDWFLFGD SRSDCNHINN LSQQNYKYMD INPELCKSGK ISAKAGNSLF KSFHF---TD F--YNYTGEG  
MHV-2 NEPLNVVSHS N-DDWFLFGD SRSDCNHISS LSQQNYKYMD INPELCKSGK ISSKAGNSLF KSFHF---TD F--YNYTGEG  
JHM NEPLNIIVSHL N-DDWFLFGD SRSDCTYVEN NGHPKLDWLD LDPKLCNSGK ISAKAGNSLF RSFHF---TD F--YNYTGEG  
RCOV NEPIINIVSHL N-DDWFLFGD SRSDCTYVEN NGHPKLDWLD LDPKLCNSGK ISAKAGNSLF RSFHF---TD F--YNYTGEG  
PuCoV NEPLNVVSHL S-DDWFLFGD SRSDCSYVEN NGHPAFDWLD LPQELCHSGK ISAKAGNSLF KSFHF---TD W--YNYTGEG  
MHV-S NEPLNIIVSHL N-DDWFLFGD SRSDCTYVEN NGHPKLDWLD LDPKLCNSGR IYAKSGNSLF RSFHF---TD F--YNYTGEG

108 [red bar] [green bar] 183  
B145 VEKVFYEGVN FSPRRQYSCW DEGVDG-WIE FKTRFYTKLY QMAAASRCIK LIQ-LQPPTS LPALT---AAV CRT---GKQL  
BRV VEKVFYEGVN FSPRRQYSCW DEGVDG-WIE LKTRFYTKLY QMATTSRCIK LIQ-LQAPSS LPTLQ---AGV CRT---NKQL  
B150 VEKVFYEGVN FSPHRQYSCY HEGTEG-WVE NKIRFYTKLY KMASTRSRIK LID-LESPPD WPSNR--LGH CLS---GRRI  
P-MAR VEKVFYEGVN FSPHRNYTCY QEGSSG-WVS NKVGFYSKLY SMASTSRCIK LIN-LDPPTN FTNYR--NGT CVGNGGTAKM  
P10 VEKVFYEGVN FSPYRNYTCY QEGSFG-WVS NKVGFYSKLY SMASTSRCIK LIN-LDPPTN FTNYR--NGT CTGNGGTAKM  
P4 VEKVFYEGVN FSPYRNYTCY HEGSSG-WVN NKAAGFYTKLY QMSTTSRCIK LIT-LEPPEN IPSHS--PGM CNPQ--TNKM  
C/MI/4/93 KHKVFYEGVN WSPHAAIDCY RKN---WTD IKLNFQKNYI ELASQSHCMS LVNALDKTIP LQATAGVAGN CNNSFLKNPA  
C/JHG/66 KHKVFYEGVN WSPHAAIDCY RKN---WTD IKLNFQKNYI ELASQSHCMS LVNALDKTIP LQVATAGVAGN CNNSFLKNPA  
BCoV QQIIFYEGVN FTPYHAFKCT TSGSNDIWMQ NKGLFYTQVY KNMAVYRSLT FVN---VPYV YNGSAQSTAL CKSG-----SL  
OC43 QQIIFYEGVN FTPYHAFKCN RSGSNDIWMQ NKGLFYTQVY KNMAVYRSLT FVN---VPYV YNGSAQATAL CKSG-----SL  
PHEV QQIIFYEGVN FTPYHAFKCT SVGNNDIWMQ NKGLFYTQVY KMAVYRSLT LVN---VPYV YNGSAQPTAL CKSG-----SL  
ECOV QQIIFYEGVN FTPNHGFKCT ASGDNAVVMQ NKARFYEIVY RSMVYRSLT FKT---VAYN YSGTAVATNL CKQS-----SL  
DVIM SQIIFYEGVN FTPYVGFKCL NNGDNNRWMG NKARFYTQLY QKMAHYRSLS VIN---ITYT YNGSAGPVSM CKHIANGVTL  
MHV-2 SQIIFYEGVN FTPYVGFKCM NNGDNNRWMG NKARFYTQLY QKMAHYRSLS IIN---VTYT YNGNATPVAM CKHTANGVTL  
JHM DQVIFYEGVN FSPNHGFKCL AYGDNKRWMG NKAIFYARVY EKMAQYRSLS FVN---VPYA YGGKAKPISI CKHK-----TL  
RCOV DQVIFYEGVN FSPSHGFKCL VEGDNNKWMG NKARFYALLY KMAQYRSLS FVT---VPYA YGGNAPKPTSI CKDK-----TL  
PuCoV DQVIFYEGVN FSPSHGFKCL AEGDNKRWMG NKARFYALVY KMAQYRSLS FVN---VSYA YGGKAKPTAI CKDN-----TL  
MHV-S DQVIFYEGVN FSPSHGFKCL AYGDNKRWMG NKAIFYARVY EKMAQYRSLS FVN---VSYA YGGNAPKPTSI CKDK-----TL

184 [green bar] 255  
B145 PDNPKFGLLA -DTNPTSQVF -VLPSSSGTT ICTKHLVPFC YL---NRGCF TT-----GGS CLPF-GVSYV SDSFYY--GY  
BRV PDNPKLALLS -DTVPTSQVF -VLPSSSGTT ICTKHLVPFC YL---NHGCF TT-----GGS CLPF-GVSYV SDSFYY--GY  
B150 PDNPKLLVLN -SNISTFVQF -QLPSVSGDV RCDRHLVPFC YL---DHGCF TA-----DRY CHPF-GVYFE SCSFYF--GF  
P-MAR PDNPQLVIFD -AVTKLSTQF -VLPSSSDGV SCTKHLVPFC YI---DGGCF EM-----SGV CHPF-GYFFE SPSFYH--GF  
P10 PDNPQLVIFN -SVVKVSTQF -VLPSSSDGF SCTKHLVPFC YI---DGGCF EM-----SGV CYPF-GYFFQ SPSFYH--GF  
P4 PDNPKLITLT -NNASVSIQF -SLPAEFNGT NCTKHLVPFC YI---DGGCF QT-----SGF CHPF-GYSYS SSFAFY--AF  
C/MI/4/93 LYTQEVTPPE -KCGKENLAF FTLPTQFGTY ECRHLVASC YFIYDSKEYV NK-----RG CDNYFQIYI--DSFGKVVGG  
C/JHG/66 LYTQEVKPE NKCGKENLAF FTLPTQFGTY ECKLHLVASC YFIYDSKEYV NK-----KRG CDNYFQIYI--DSFGKVVGG  
BCoV VLNNP-AYIA -REANFGDY YKVEADFYLS GCDEYIVPLC IF---NGKFL SN-----TKY YDSSQYFFNK DTGVYI--GL  
OC43 VLNNP-AYIA -PQANSQDY YKVEADFYLS GCDEYIVPLC IF---NGKFL SN-----TKY YDSSQYFFNK DTGVYI--GL  
PHEV ILNNP-AYIA -REANVGDY YKSEADFSLS GCDEYIVPLC IF---NGKFL SN-----TKY YDSSQYFFNK DTGVYI--GL  
ECOV TMNNP-TFIA -KESGFTDY YTSIANFSLQ GCDEYIIVPLC YF---NGKFL SS-----SKY YDSSVYFFNI DTGEVF--GF  
DVIM TLNNP-TFIG -KEVSKPDY YSEANFTLQ GCDEYIVPLC VF---NGQYL SS-----KLY YDSSQYFFNI DTGVLY--GF  
MHV-2 TLNNP-TFIG -KETSAPNY YSEANFTLH GCDEYIVPLC VF---NGQYL SS-----KLY YDSSQYFFNI DTGVLY--GF  
JHM TLNNP-TFIS -KESNYVDY YSEANFTLA GCDEYIVPLC VF---NGHSK GSSSDPANKY YDSSQYFFNI DTGVLY--GF  
RCOV TLNNP-TFIS -KESNYVDY YVSEANFTLQ GCDEYIVPLC VF---NGHSR GSSSDPANKY YDSSQYFFNI DTGVLY--GF  
PuCoV TLNNP-TFIS -KESNYVDY YESDANFTLE GCDEYIVPLC VF---NGHSR GSSSDPANKY YDSSQYFFNI DTGVLY--GF  
MHV-S TLNNP-TFIS -KESNYVDY YSEANFTLQ GCDEYIVTLC VS---NGHSK SSSSDPANKY YDSSQYFFNI DTGVLY--GF

256 [green bar] [red bar] 334  
B145 YDA--TPQIG ST-EFHdyvc DYLFMEPGTY NASTVGKFLV YPTKSYCMDT MNITVPVQAV QSIWSEQYAS DDAIGQAC-K  
BRV YDA--TPQIG ST-ESHdyvc DYLFMEPGTY NASTVGKFLV YPTKSYCMDT MNITVPVQAV QSIWSEQYAS DDAIGQAC-K  
B150 YDN--NKYSG S--EFHNfvc KYLLMEPGVY NASTAGKFLV YPTKSYCMDT MNITVPVQAV QSIWSEQYAS DDAIGLAC-K  
P-MAR YTN--GTA-G ----LHsYIC DYLEMKPGVY NATTFGKFLI YPTKSYCMDT MNITVPVQAV QSIWSENROS DDAIGQAC-K  
P10 YTN--GTA-G ----LHRyIC DYLEMKPGVY NATTFGKFLI YPTKSYCMDT MNITVPVQAV QSIWSENROS DDAIGQAC-K  
P4 YTE--GTPVG ----KHNYIC DYLEMKPGVY NATTFGKFLI YPTKSYCMDT MNITVPVQAV QSIWSENROS DDAIGMAC-K  
C/MI/4/93 LDNRVSPYTG NTGDTPTMQC DMIQLKPGRY SVRSSPRFLL MPERSYCFD- MKEKGPVTAV QSIWKGDRKS DYAVDQACLs  
C/JHG/66 LDNRVSPYTG NSGDTPTMQC DMIQLKPGRY SVRSSPRFLL MPERSYCFD- MKEKGPVTAV QSIWKGGRS DYAVDQACLs  
BCoV NST-ETITT- ----GDFnc HYLVLPSGNY LAISNELLLT VPTKAICLNK RKDFTFPVQV DSRWNNARQS DNMTAVAC-Q  
OC43 NST-ETITT- ----GDFLnc YYLVLPSGNY LAISNELLLT VPTKAICLNK RKDFTFPVQV DSRWNNARQS DNMTAVAC-Q  
PHEV NST-ETITT- ----GDFnc HYLVLPSGNY LAISNELLLT VPTKAICLNK RKVFTFPVQV DSRWNNARQS DNMTAVAC-Q  
ECOV NST-RPTAD- ----GDFnc FYRVPSGLY QAISEYELMLT VPSKAIICLSK PKDFTFPVQV DSRWNSARRS DNMTAIAC-Q  
DVIM NST-LNITS- ----GLDlTC IYLALTPGNY LAISNELLLT VPSKAIICLSK PKAFTFPVQV DSRWNSARRS DNMTAIAC-Q  
MHV-2 NST-LNITG- ----LDLTC IYLSLAPGNY KAILNELLLT IPSKAIICLSK PKVFTLQVQV DSRWNSARRS DNMTAIAC-Q  
JHM NST-LDVGNT AKDPGLDLTC RYLALTPGNY KAVSLEYLLS LPSKAIICLSK PKRFMPVQV DSRWNSARRS DNMTAVAC-Q  
RCOV NST-LDVGNT AQNPGLDLTC MYLVLTGPNY KAVSLEYLLT IPSKAIICLSK PKRFMPVQV DSRWNSARRS DNMTAVAC-Q  
PuCoV NST-LDVGNT AQNPGLDLTC IYALTPGNY KAVSLEYLLT IPSKAIICLSK PKRFMPVQV DSRWNNARQS DNMTAVAC-Q  
MHV-S NST-LDVGNT VQNPGLDLTC RYLALTPGNY KAVSLEYLLS LPSKAIICLSK PKRFMPVQV DSRWNSARRS DNMTAVAC-Q



**Suppl. Fig. 1.** Structure-based alignment of orthomyxo- and nidoviral HE proteins. Receptor-binding (R), fusion (F), and esterase domains (E) as identified for HEF by Rosenthal *et al.* (1998) are indicated by green, blue and red bars, respectively. The numbering of amino acid residues corresponds to that of HEF of Influenza C virus strain Johannesburg/66. Active site residues are shown in red. Residues, thought to form the oxyanion hole (corresponding to Gly<sup>85</sup>, Asn<sup>117</sup> and Arg<sup>322</sup> of HEF), are shown in blue. BCoV: bovine coronavirus; OC43: human coronavirus OC43; PHEV: porcine hemagglutinating encephalomyelitis virus; ECoV: equine coronavirus; MHV: murine hepatitis virus (strains JHM, DVIM, -2 and -S; RCoV: rat sialodacryoadenitis coronavirus; PuCoV: puffinosis virus; C/MI/4/93: influenza C virus strain Miyagi; C/JHG/66: influenza C virus strain Johannesburg; BRV, B145, B150: bovine torovirus strains Breda, B145 and B150; P-MAR, P10, P4: porcine torovirus strains Markelo, P10 and P4.
